# Supplementary material
Source: Frontiers journal article supplement (https://www.frontiersin.org/articles/513425)
Supplement: Data_Sheet_1.PDF [file Data_Sheet_1.PDF]

## Supplementary Material

### 1. Supplementary Figures

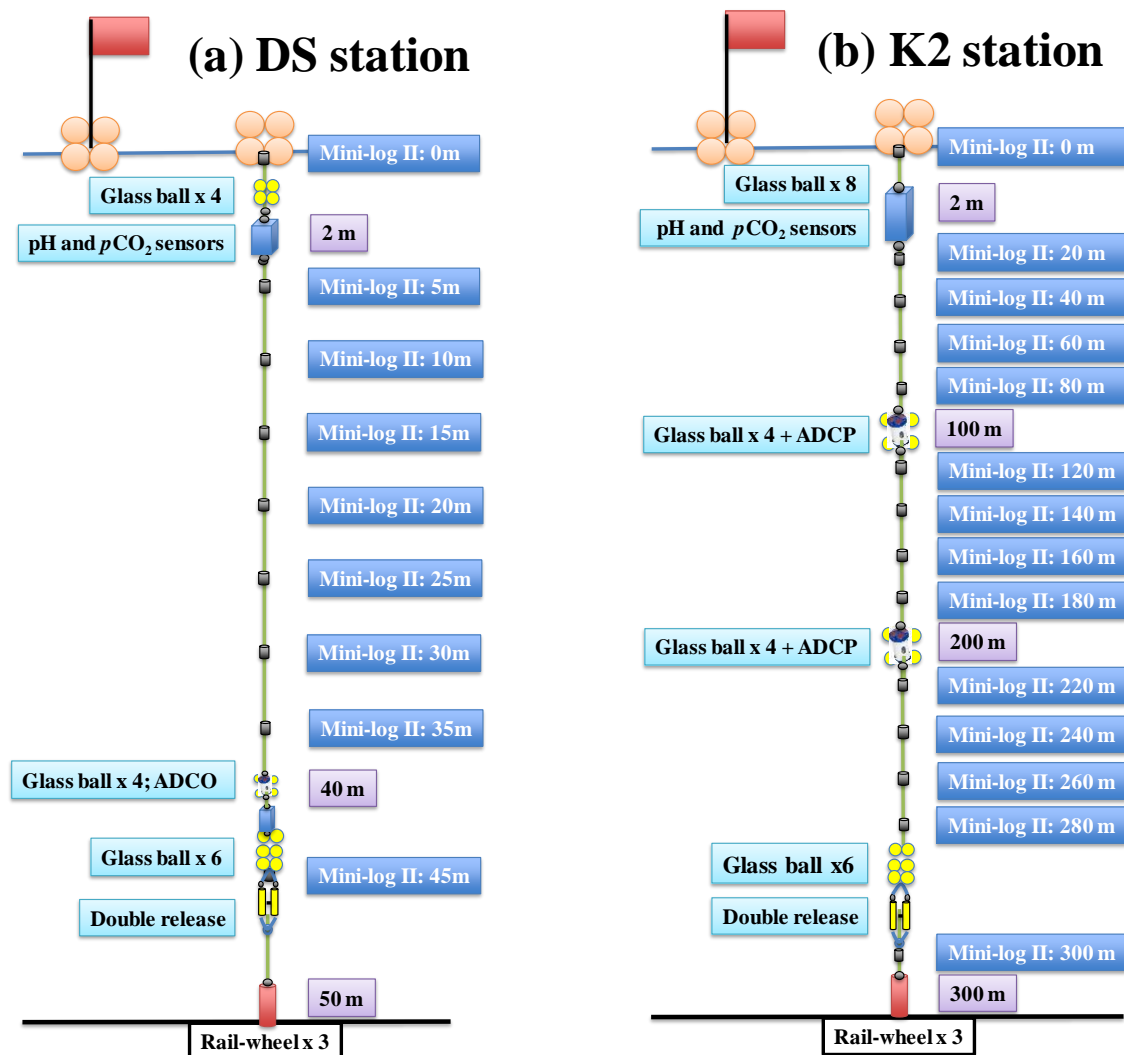

**Supplementary Figure 1.** The configurations of the moored buoys deployed at the (a) DS, and (b) K2 stations. The moored buoy at the DS station contains 9 temperature data loggers (Minilog-II-T, VEMCO) at depths of 0, 5, 10, 15, 20, 25, 30, 35 and 45 m; an acoustic Doppler current profiler (ADCP; WH Sentinel, Teledyne RD Instruments) at 40 m; and a pH sensor (SeaFETTM V2, Sea-Bird Scientific) and a pCO<sub>2</sub> sensor (Mini CO2TM, Pro-Oceanus Systems) at 2 m. The moored buoy at the K2 station contains 14 temperature data loggers at depths of 0, 20, 40, 60, 80, 120, 140, 160, 180, 220, 240, 260, 280 and 300 m; two ADCPs at depths of 100 m and 200 m; and a pH sensor and a pCO<sub>2</sub> sensor at 2 m.

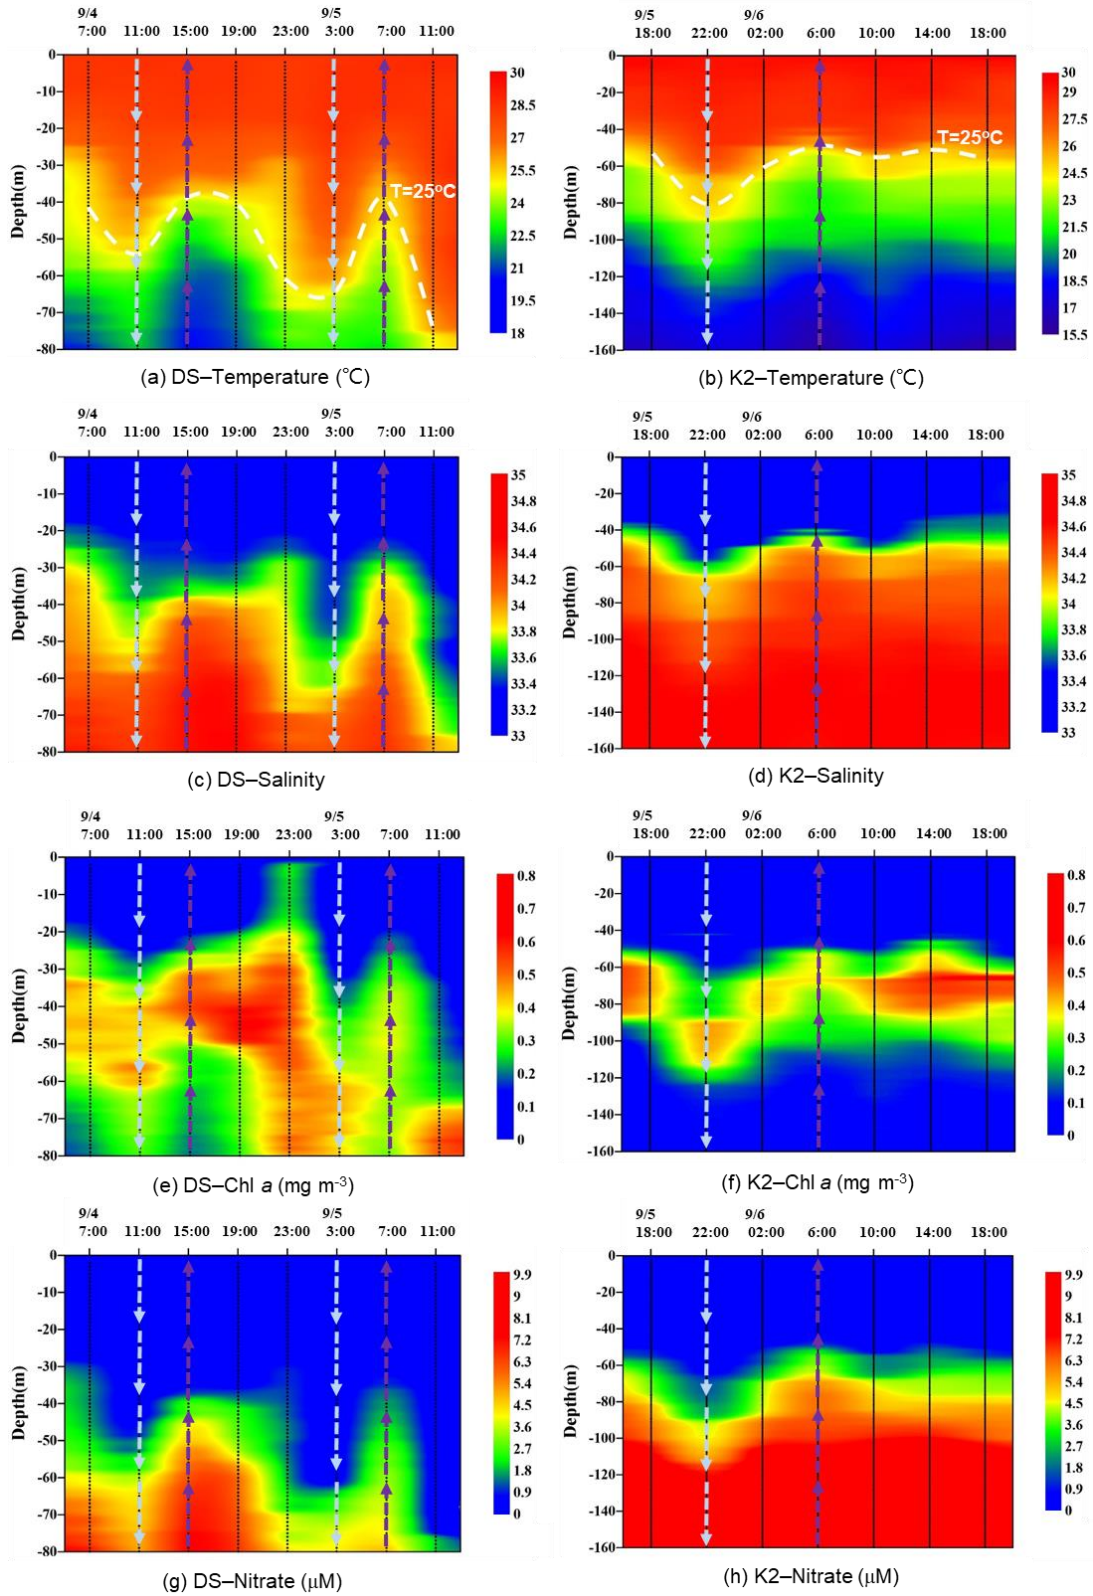

**Supplementary Figure 2.** The temporal variations in the depth distributions of temperature (a and b), salinity (c and d), nitrate (e and f), and Chl  $a$  (g and h) at the DS (left) and K2 (right) stations. The light blue and purple arrows denote the downward and upward phases of isotherm displacements.

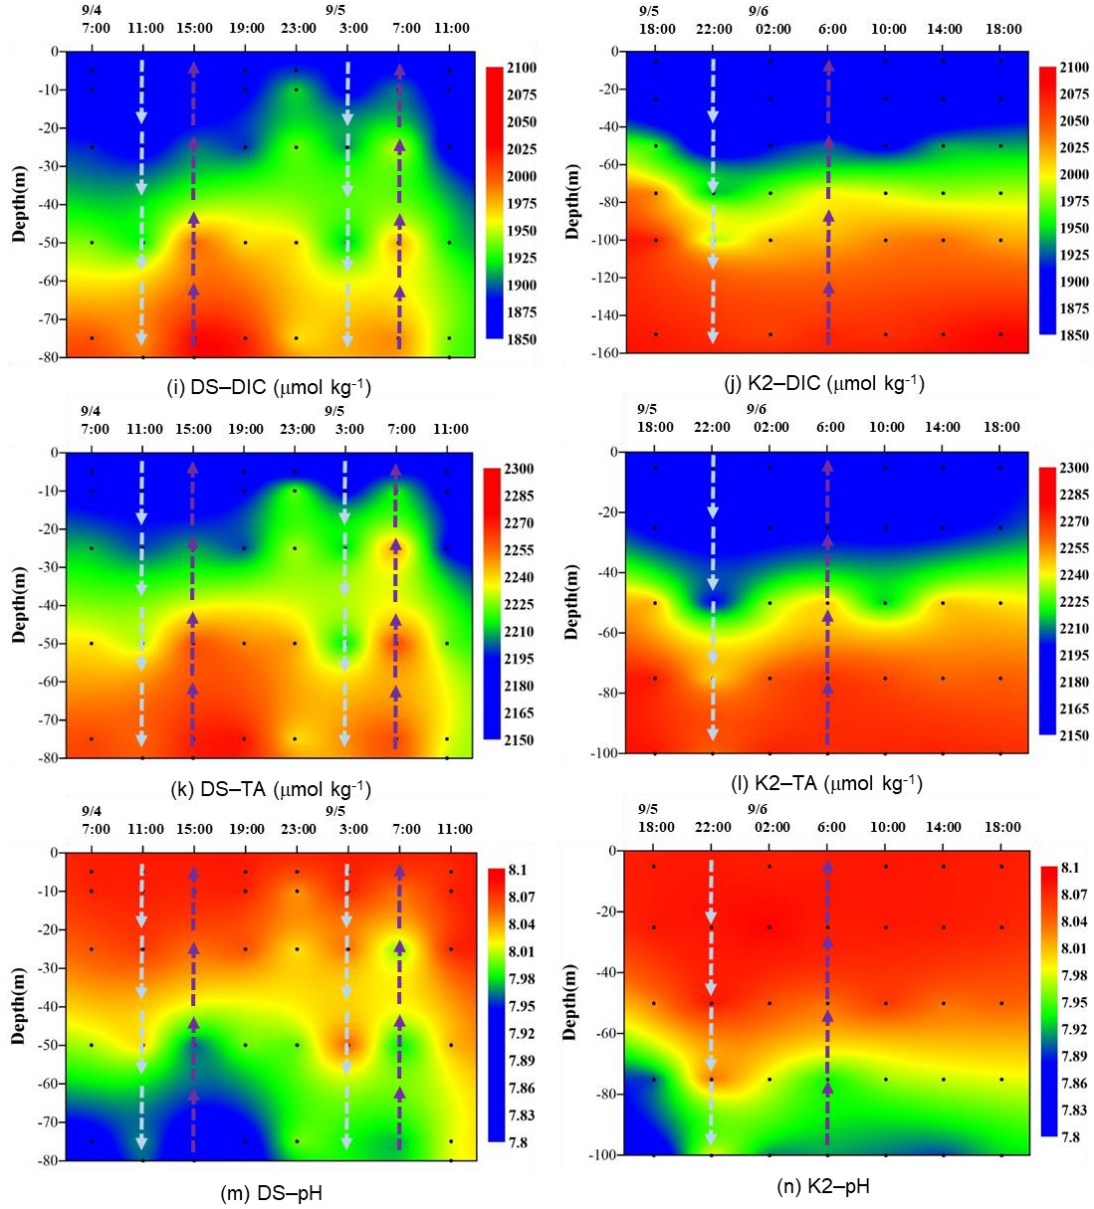

**Supplementary Figure 2 (continued)** The temporal variations in the depth distributions of DIC (i and j), TA (k and l), and pH (m and n) at the DS (left) and K2 (right) stations. The light blue and purple arrows denote the downward and upward phases of isotherm displacements.

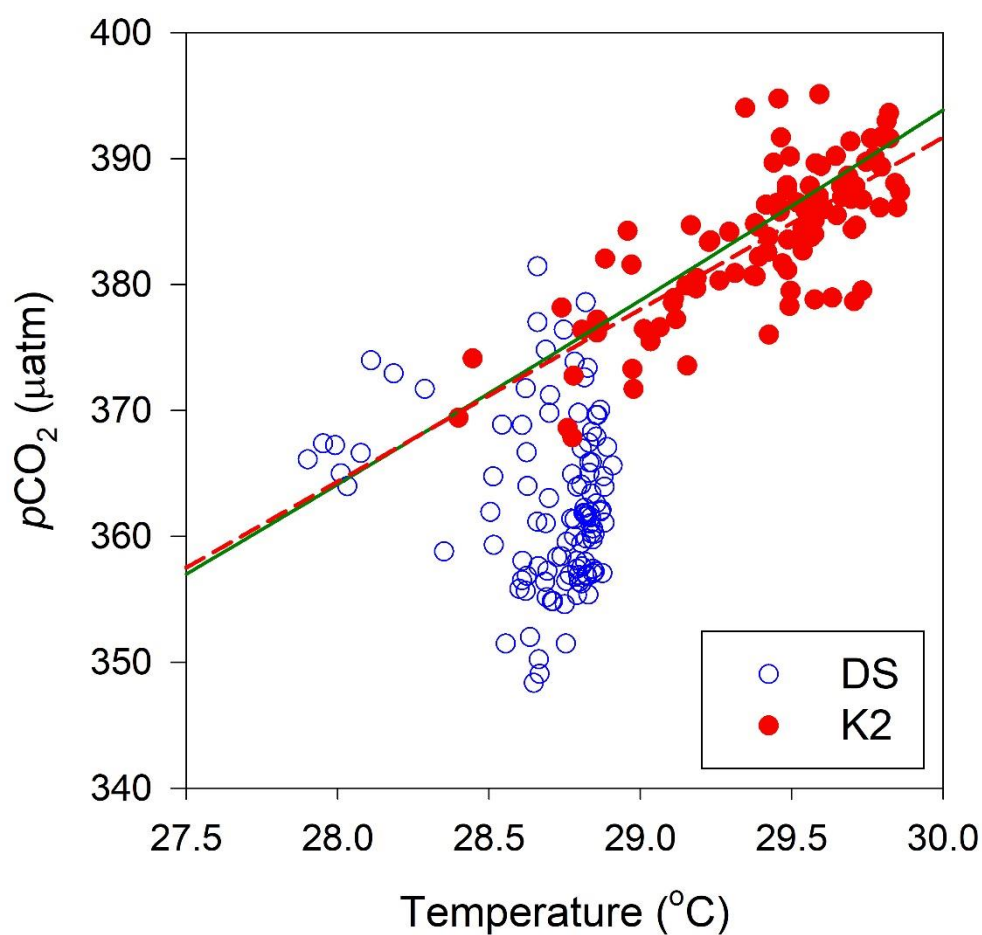

**Supplementary Figure 3** Plot of  $p\text{CO}_2$  vs. temperature for the data collected from the DS (open circles) and K2 (solid circles) stations. The dashed line represents the linear regression on the data collected from the K2 station, and the solid line corresponds to the theoretical thermodynamic dependency between  $p\text{CO}_2$  and temperature.

## 2. Supplementary Table

Supplementary Table 1. A comparison of the variation range and mean  $\pm$  standard deviation of temperature,  $p\text{CO}_2$  and pH in surface water (2 m) between the DS and K2 stations. Differences in all parameters' means between the DS and K2 stations were assessed using an analysis of variance (f-test) followed by a comparison of mean values (t-test), and a significance level (p-value) of 0.001 was used to determine significant statistical differences.

|                                    | DS station                            | K2 station                            | p-value |
|------------------------------------|---------------------------------------|---------------------------------------|---------|
| Temperature ( $^{\circ}\text{C}$ ) | 27.9–28.9<br>(28.7 $\pm$ 0.2; n=109)  | 28.4–29.9<br>(29.4 $\pm$ 0.3; n=97)   | p<0.001 |
| $p\text{CO}_2$ ( $\mu\text{atm}$ ) | 348–381<br>(362 $\pm$ 7; n=109)       | 368–395<br>(383 $\pm$ 6; n=97)        | p<0.001 |
| pH                                 | 8.01–8.05<br>(8.03 $\pm$ 0.01; n=163) | 8.00–8.03<br>(8.01 $\pm$ 0.00; n=146) | p<0.001 |

## Supplementary Method

### Calculation of temperature driven $p\text{CO}_2$ and non-temperature driven $p\text{CO}_2$

In order to better understand the processes controlling the observed variation in surface  $p\text{CO}_2$ , we have calculated the temperature driven  $p\text{CO}_2$  and non-temperature driven  $p\text{CO}_2$  using the method proposed by Takahashi et al. (2002):

$$\text{Temperature driven } p\text{CO}_2 = (\text{Mean } p\text{CO}_2) \times \exp [0.0423(T_{\text{obs}} - T_{\text{mean}})] \dots (1)$$

where T is temperature in °C, and the subscripts “mean” and “obs” stand for the average and observed values, respectively. In the calculations, we used the averaged values of  $p\text{CO}_2$  (362 and 383  $\mu\text{atm}$  for the DS and K2 stations, respectively) and temperature (28.7 and 29.4°C for the DS and K2 stations, respectively) measured throughout the mooring period as the mean. The resultant  $p\text{CO}_2$ , designated as “temperature driven  $p\text{CO}_2$ ”, are the expected  $p\text{CO}_2$  values that are only affected by temperature if a parcel of water with the mean  $p\text{CO}_2$  value are subjected to temperature changes (the difference between observed and mean temperature) under constant TA and DIC.

Moreover, in order to further discern other factors besides temperature that may affect  $p\text{CO}_2$  changes, we normalized the observed  $p\text{CO}_2$  to a constant temperature using the following equation (Takahashi et al. 2002):

$$\text{Non-temperature driven } p\text{CO}_2 = (p\text{CO}_2)_{\text{obs}} \times \exp [0.0423(T_{\text{mean}} - T_{\text{obs}})] \dots (2)$$

where T and the subscripts “mean” and “obs” are defined as the same as those in Eq. (1).

#### Reference:

Takahashi, T., Sutherland, S.C., Sweeney, C., Poisson, A., Metzl, N., and Tillbrook, B. (2002). Global sea-air  $\text{CO}_2$  flux based on climatological surface ocean  $p\text{CO}_2$ , and seasonal biological and temperature effects. Deep-Sea Res. II 49, 1601–1622.
